# Supplementary material for: Trametinib Induces the Stabilization of a Dual GNAQ p.Gly48Leu- and FGFR4 p.Cys172Gly-Mutated Uveal Melanoma. The Role of Molecular Modelling in Personalized Oncology
Source: PubMed Central journal article supplement (PMC7662249; doi:10.3390/ijms21218021), 2020-10-28
Supplement: ijms-21-08021-s001.pdf [file ijms-21-08021-s001.pdf]

# Trametinib Induces the Stabilization of A Dual GNAQ p.Gly48Leu- and FGFR4 p.Cys172Gly-Mutated Uveal Melanoma. The Role of Molecular Modelling in Personalized Oncology

Fanny S. Krebs <sup>1</sup>, Camille Gérard <sup>2</sup>, Alexandre Wicky <sup>2</sup>, Veronica Aedo-Lopez <sup>3</sup>, Edoardo Missiaglia <sup>4,5</sup>, Bettina Bisig <sup>5</sup>, Mounir Trimech <sup>5</sup>, Olivier Michielin <sup>2,3,4</sup>, Krisztian Homicsko <sup>2,4,6</sup> and Vincent Zoete <sup>1,4,\*</sup>

## Appendix A

### FoldX procedure

FoldX is a well-known software for predicting changes in free energy of folding caused by mutations. It permits a rapid estimation of the effect of mutations on the stability of proteins and nucleic acids. Its predictive efficiency has been trained on a large set of mutants covering most of the existing structural environment. The energy terms used in FoldX estimation calculations have been weighted using empirical data obtained from protein engineering experiments [<http://foldxsuite.crg.eu/products>]. Potapov et al. [1] demonstrated that FoldX\_3.0 shown the best correlation ( $r = 0.96$ ) between experimental and average predicted change in protein stability values ( $\Delta\Delta G$ ), compare to other software like Rosetta and I-Mutant\_2.0.

To predict the potential impact of a mutation in a structure, the FoldX command line *PositionScan* was used. In this procedure, the selected residue is first mutated to alanine and all neighbors residues are identified. Then, FoldX “mutates” the wild-type residue (selected position) to itself. Then, the neighbor residues are “mutated” to themselves; this is followed each time by the “mutation” of the wild-type selected position to itself. This process guarantees that the virtual *real* mutation by FoldX will potentially move only residues that were moved in the wild-type reference. Finally, the selected position is mutated into the desired residue.

Command line example:

```
FoldX --command=PositionScan --pdb=PDB_ID --positions=GA48L
```

In this example, FoldX will mutate Gly48 from the chain A into Leucine.

The output result corresponds to the  $\Delta\Delta G$  in kcal/mol between the wild type and the mutant free energy structures ( $\Delta\Delta G = \Delta G_{\text{Mutant}} - \Delta G_{\text{Wild-Type}}$ ).

## Experimental structure selection

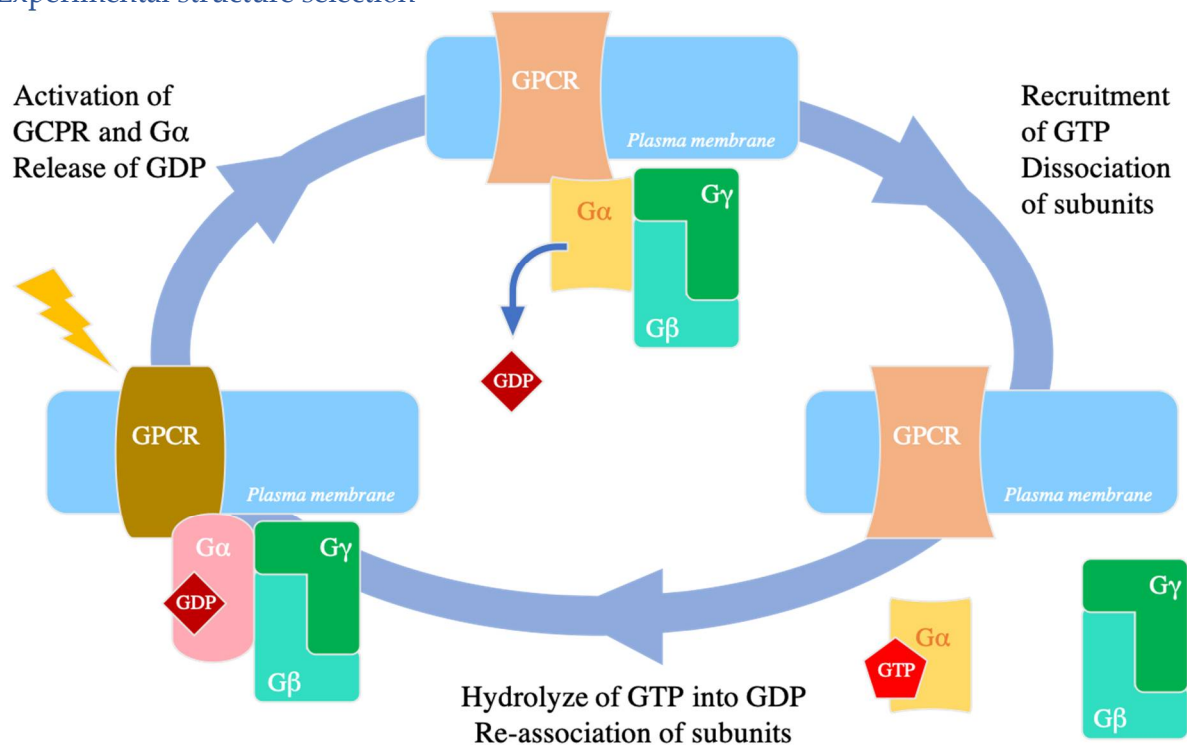

**Figure S1.** GPCRs and G protein subunits activation cycle.

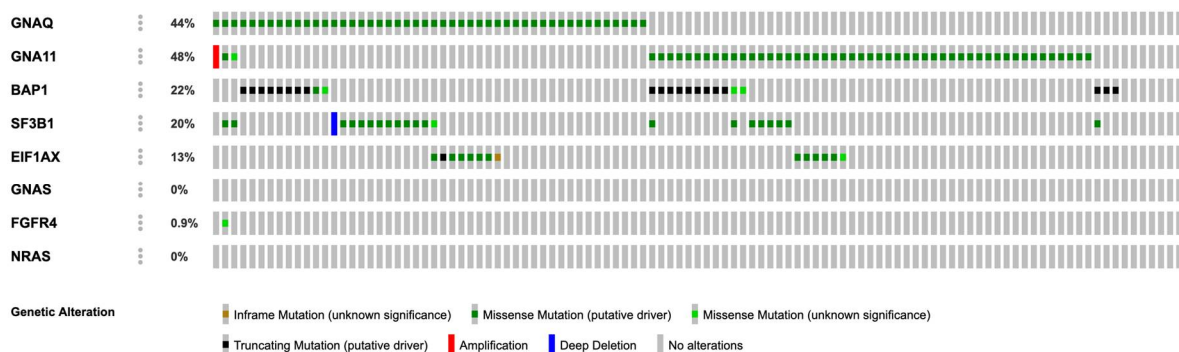

**Figure S2.** cBioportal oncoprint of the five mostly mutated genes (*GNAQ*, *GNAQ11*, *BAP1*, *SF3B1*, *EIF1AX*), plus mutated genes detected in our patient case, NGS results detected in 108 uveal melanoma patients of two cohorts ( $n = 28$  [1] and  $n = 80$  [2]) [3,4]

**Table S1.** Sequence identity of FGFR4 with FGFR1,-2 and -3.

|       | Sequence identity with FGFR4 |
|-------|------------------------------|
| FGFR1 | 57%                          |
| FGFR2 | 58%                          |
| FGFR3 | 61%                          |

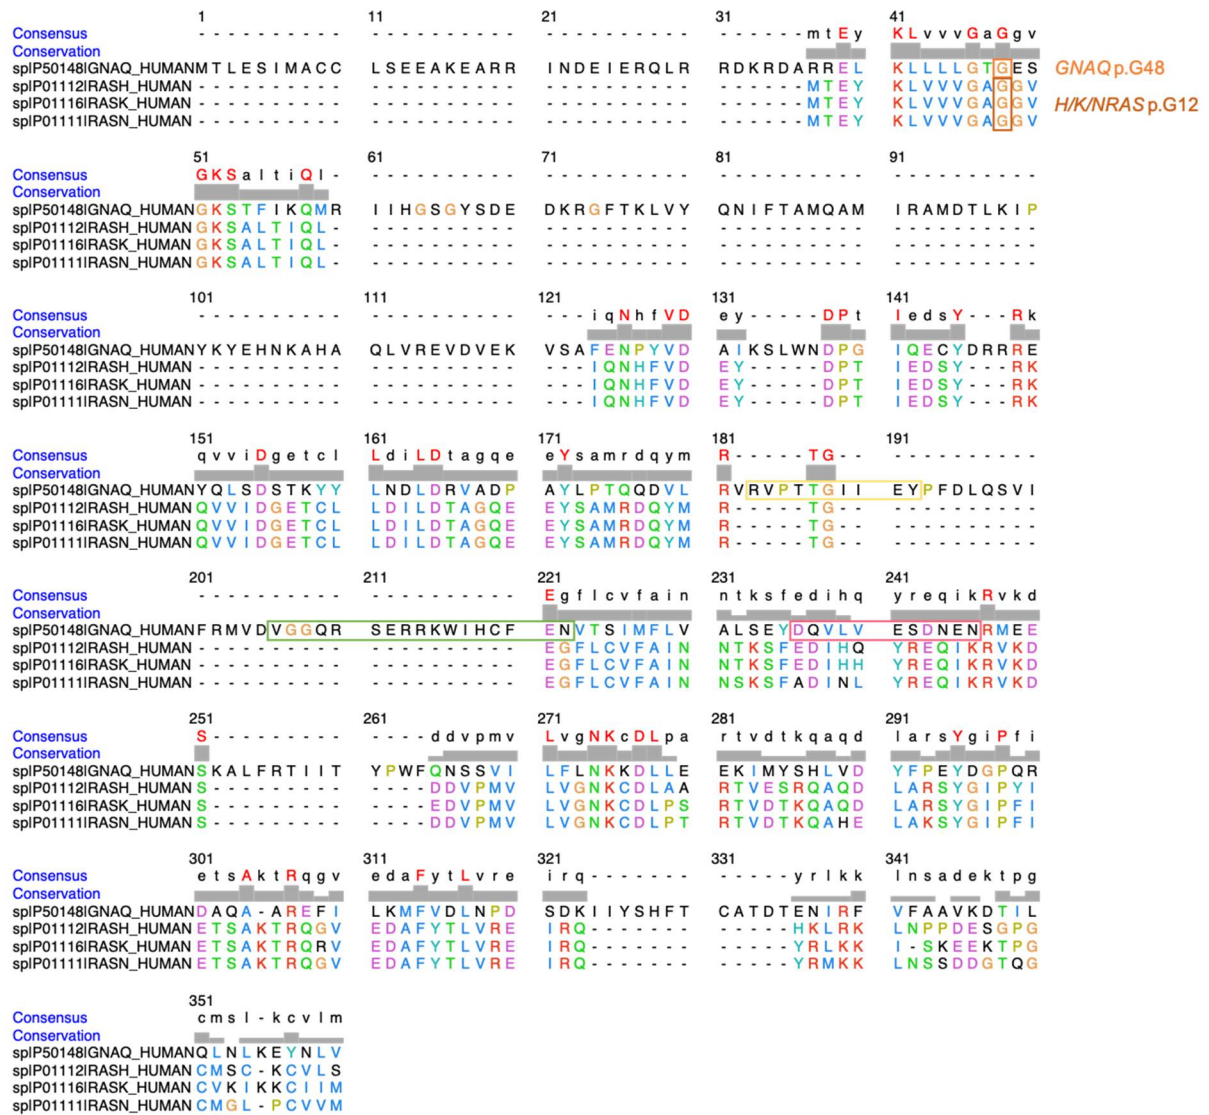

**Figure S3.** Sequence alignment of human *H/K/NRAS* and human *GNAQ*. Interestingly, *GNAQ* p.G48 corresponds to *H/K/NRAS* p.G12 which is a hotspot in RAS. The yellow, green and pink rectangles indicate the switch regions I, II and III in *GNAQ*, respectively.

a. Inactive conformation

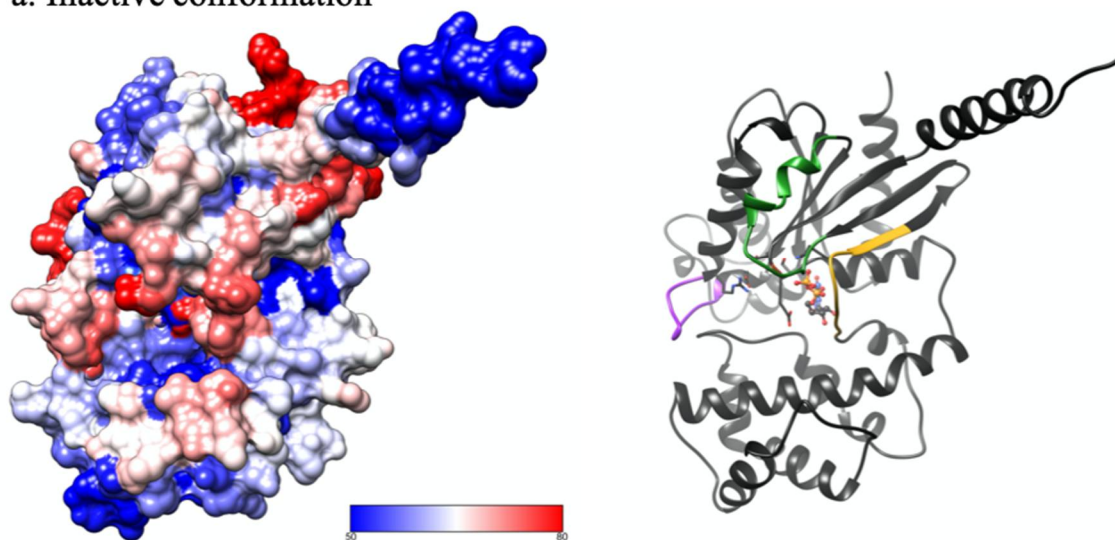

b. Active conformation

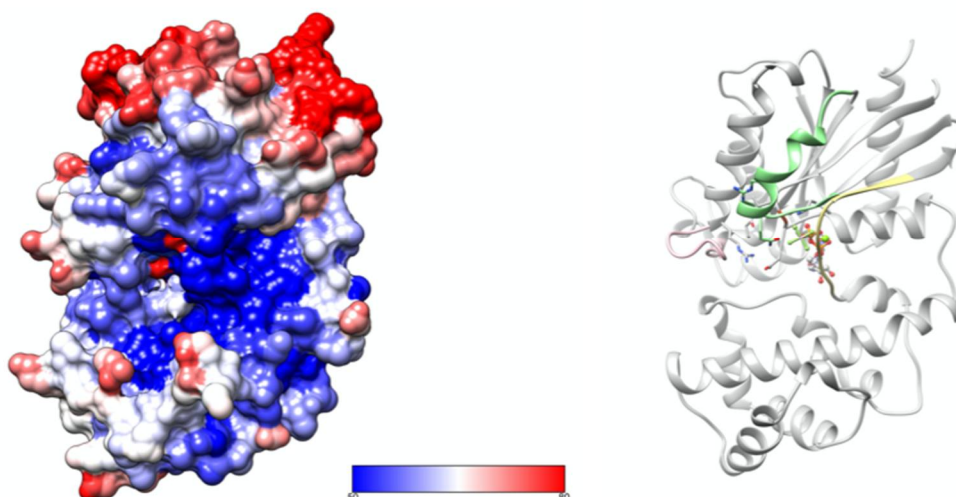

**Figure S4.** B-factor representation of inactive and active structures. (a). The active conformation was obtained as a co-crystal with GDP,  $\text{AlF}_4$  and  $\text{Mg}^{2+}$  (PDB ID 3ohm); (b). The inactive conformation as a co-crystal with GDP (PDB ID 3ah8). The gradient corresponding to the B-factor values goes from blue to red, for rigid and flexible regions respectively. GDP and  $\text{AlF}_4$  are shown in ball&stick and the  $\text{Mg}^{2+}$  in sphere representations, respectively. SW-I (183-192), SW-II (206-222) and SW-III (236-246) are respectively colored in gold, green and salmon.

|                             | RDKRDARREL  | KLLLLLGTGES | GKSTFIKQMR |
|-----------------------------|-------------|-------------|------------|
| Homo sapiens                | RDKRDARREL  | KLLLLLGTGES | GKSTFIKQMR |
| Pan troglodytes             | RDKRDARREL  | KLLLLLGTGES | GKSTFIKQMR |
| Macaca nemestrina           | RDKRDARREL  | KLLLLLGTGES | GKSTFIKQMR |
| Mus musculus                | RDKRDARREL  | KLLLLLGTGES | GKSTFIKQMR |
| Rattus norvegicus           | RDKRDARREL  | KLLLLLGTGES | GKSTFIKQMR |
| Pongo abelii                | RDKRDARREL  | KLLLLLGTGES | GKSTFIKQMR |
| Xiphophorus maculatus       | KDKKDSQREF  | KLLLLLGTGES | GKSTFIKQMR |
| Poecilia reticulata         | KDKKDSQREY  | KLLLLLGTGES | GKSTFIKQMR |
| Poecilia latipinna          | KDKKDSQREF  | KLLLLLGTGES | GKSTFIKQMR |
| Anolis carolinensis         | RDKRDARREL  | KLLLLLGTGES | GKSTFIKQMR |
| Gallus gallus               | RDKRDARREL  | KLLLLLGTGES | GKSTFIKQMR |
| Canis lupus familiaris      | RDKRDARREL  | KLLLLLGTGES | GKSTFIKQMR |
| Sus scrofa                  | RDKRDARREL  | KLLLLLGTGES | GKSTFIKQMR |
| Ursus arctos horribilis     | RDKRDARREL  | KLLLLLGTGES | GKSTFIKQMR |
| Callithrix jacchus          | RDKRDARREL  | KLLLLLGTGES | GKSTFIKQMR |
| Propithecus coquereli       | RDKRDARREL  | KLLLLLGTGES | GKSTFIKQMR |
| Delphinapterus leucas       | RDKRDARREL  | KLLLLLGTGES | GKSTFIKQMR |
| Rhinopithecus roxellana     | RDKRDARREL  | KLLLLLGTGES | GKSTFIKQMR |
| Monodelphis domestica       | RDKRDARREL  | KLLLLLGTGES | GKSTFIKQMR |
| Sarcophilus harrisii        | RDKRDARREL  | KLLLLLGTGES | GKSTFIKQMR |
| Lipotes vexillifer          | RDKRDARREL  | KLLLLLGTGES | GKSTFIKQMR |
| Tursiops truncatus          | RDKRDARREL  | KLLLLLGTGES | GKSTFIKQMR |
| Bos taurus                  | RDKRDARREL  | KLLLLLGTGES | GKSTFIKQMR |
| Odobenus rosmarus divergens | RDKRDARREL  | KLLLLLGTGES | GKSTFIKQMR |
| Felis catus                 | RDKRDARREL  | KLLLLLGTGES | GKSTFIKQMR |
| Capra hircus                | RDKRDARREL  | KLLLLLGTGES | GKSTFIKQMR |
| Nomascus leucogenys         | RDKRDARREL  | KLLLLLGTGES | GKSTFIKQMR |
| Equus caballus              | RDKRDARREL  | KLLLLLGTGES | GKSTFIKQMR |
| Erinaceus europaeus         | RDKRDARREL  | KLLLLLGTGES | GKSTFIKQMR |
| Danio rerio                 | RDKKDSARREL | KLLLLLGTGES | GKSTFIKQMR |
| Ictalurus punctatus         | RDKKDSRREL  | KLLLLLGTGES | GKSTFIKQMR |
| Xenopus tropicalis          | RDKRDARREL  | KLLLLLGTGES | GKSTFIKQMR |

**Human Gly48**

Figure S5. Sequence alignment of GNAQ orthologs centred on Human Gly48.

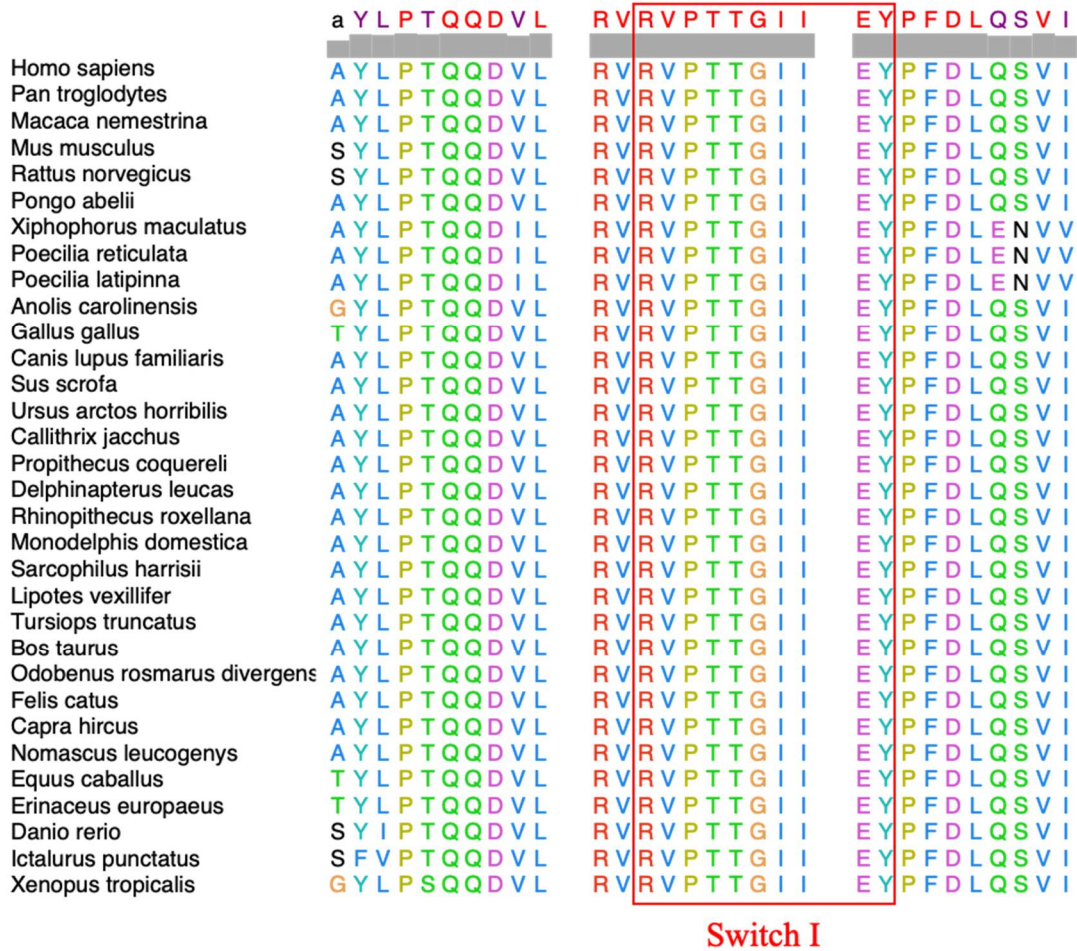

Figure S6. Sequence alignment of *GNAQ* orthologs centred on the Switch I loop (residues 183-192 based on human sequence).

|                             | E Y P F D L Q S V I | F R M V D V G G Q R | S E R R K W I H C F | E N V T S I M F L V |
|-----------------------------|---------------------|---------------------|---------------------|---------------------|
| Homo sapiens                | E Y P F D L Q S V I | F R M V D V G G Q R | S E R R K W I H C F | E N V T S I M F L V |
| Pan troglodytes             | E Y P F D L Q S V I | F R M V D V G G Q R | S E R R K W I H C F | E N V T S I M F L V |
| Macaca nemestrina           | E Y P F D L Q S V I | F R M V D V G G Q R | S E R R K W I H C F | E N V T S I M F L V |
| Mus musculus                | E Y P F D L Q S V I | F R M V D V G G Q R | S E R R K W I H C F | E N V T S I M F L V |
| Rattus norvegicus           | E Y P F D L Q S V I | F R M V D V G G Q R | S E R R K W I H C F | E N V T S I M F L V |
| Pongo abelii                | E Y P F D L Q S V I | F R M V D V G G Q R | S E R R K W I H C F | E N V T S I M F L V |
| Xiphophorus maculatus       | E Y P F D L E N V V | F R M V D V G G Q R | S E R R K W I H C F | E K V T S I M F L V |
| Poecilia reticulata         | E Y P F D L E N V V | F R M V D V G G Q R | S E R R K W I H C F | E K V T S I M F L V |
| Poecilia latipinna          | E Y P F D L E N V V | F R M V D V G G Q R | S E R R K W I H C F | E K V T S I M F L V |
| Anolis carolinensis         | E Y P F D L Q S V I | F R M V D V G G Q R | S E R R K W I H C F | E N V T S I M F L V |
| Gallus gallus               | E Y P F D L Q S V I | F R M V D V G G Q R | S E R R K W I H C F | E N V T S I M F L V |
| Canis lupus familiaris      | E Y P F D L Q S V I | F R M V D V G G Q R | S E R R K W I H C F | E N V T S I M F L V |
| Sus scrofa                  | E Y P F D L Q S V I | F R M V D V G G Q R | S E R R K W I H C F | E N V T S I M F L V |
| Ursus arctos horribilis     | E Y P F D L Q S V I | F R M V D V G G Q R | S E R R K W I H C F | E N V T S I M F L V |
| Callithrix jacchus          | E Y P F D L Q S V I | F R M V D V G G Q R | S E R R K W I H C F | E N V T S I M F L V |
| Propithecus coquereli       | E Y P F D L Q S V I | F R M V D V G G Q R | S E R R K W I H C F | E N V T S I M F L V |
| Delphinapterus leucas       | E Y P F D L Q S V I | F R M V D V G G Q R | S E R R K W I H C F | E N V T S I M F L V |
| Rhinopithecus roxellana     | E Y P F D L Q S V I | F R M V D V G G Q R | S E R R K W I H C F | E N V T S I M F L V |
| Monodelphis domestica       | E Y P F D L Q S V I | F R M V D V G G Q R | S E R R K W I H C F | E N V T S I M F L V |
| Sarcophilus harrisii        | E Y P F D L Q S V I | F R M V D V G G Q R | S E R R K W I H C F | E N V T S I M F L V |
| Lipotes vexillifer          | E Y P F D L Q S V I | F R M V D V G G Q R | S E R R K W I H C F | E N V T S I M F L V |
| Tursiops truncatus          | E Y P F D L Q S V I | F R M V D V G G Q R | S E R R K W I H C F | E N V T S I M F L V |
| Bos taurus                  | E Y P F D L Q S V I | F R M V D V G G Q R | S E R R K W I H C F | E N V T S I M F L V |
| Odobenus rosmarus divergens | E Y P F D L Q S V I | F R M V D V G G Q R | S E R R K W I H C F | E N V T S I M F L V |
| Felis catus                 | E Y P F D L Q S V I | F R M V D V G G Q R | S E R R K W I H C F | E N V T S I M F L V |
| Capra hircus                | E Y P F D L Q S V I | F R M V D V G G Q R | S E R R K W I H C F | E N V T S I M F L V |
| Nomascus leucogenys         | E Y P F D L Q S V I | F R M V D V G G Q R | S E R R K W I H C F | E N V T S I M F L V |
| Equus caballus              | E Y P F D L Q S V I | F R M V D V G G Q R | S E R R K W I H C F | E N V T S I M F L V |
| Erinaceus europaeus         | E Y P F D L Q S V I | F R M V D V G G Q R | S E R R K W I H C F | E N V T S I M F L V |
| Danio rerio                 | E Y P F D L Q S V I | F R M V D V G G Q R | S E R R K W I H C F | E N V T S I M F L V |
| Ictalurus punctatus         | E Y P F D L Q S V I | F R M V D V G G Q R | S E R R K W I H C F | E N V T S I M F L V |
| Xenopus tropicalis          | E Y P F D L Q S V I | F R M V D V G G Q R | S E R R K W I H C F | E N V T S I M F L V |

Switch II

Figure S7. Sequence alignment of *GNAQ* orthologs centred on the Switch II loop (206-222 based on human sequence)

|                             | ENVTSIMFLV | ALSEYDQVLV | ESDNENRMEE | SKALFRTIIT |
|-----------------------------|------------|------------|------------|------------|
| Homo sapiens                | ENVTSIMFLV | ALSEYDQVLV | ESDNENRMEE | SKALFRTIIT |
| Pan troglodytes             | ENVTSIMFLV | ALSEYDQVLV | ESDNENRMEE | SKALFRTIIT |
| Macaca nemestrina           | ENVTSIMFLV | ALSEYDQVLV | ESDNENRMEE | SKALFRTIIT |
| Mus musculus                | ENVTSIMFLV | ALSEYDQVLV | ESDNENRMEE | SKALFRTIIT |
| Rattus norvegicus           | ENVTSIMFLV | ALSEYDQVLV | ESDNENRMEE | SKALFRTIIT |
| Pongo abelii                | ENVTSIMFLV | ALSEYDQVLV | ESDNENRMEE | SKALFRTIIT |
| Xiphophorus maculatus       | EKVTSIMFLV | ALSEYDQVLA | ESNHENRMEE | SMALFETIIK |
| Poecilia reticulata         | EKVTSIMFLV | ALSEYDQVLA | ESNHENRMEE | SMALFETIIK |
| Poecilia latipinna          | EKVTSIMFLV | ALSEYDQVLA | ESNHENRMEE | SMALFETIIK |
| Anolis carolinensis         | ENVTSIMFLV | ALSEYDQVLV | ESDNENRMEE | SKALFRTIIT |
| Gallus gallus               | ENVTSIMFLV | ALSEYDQVLV | ESDNENRMEE | SKALFRTIIT |
| Canis lupus familiaris      | ENVTSIMFLV | ALSEYDQVLV | ESDNENRMEE | SKALFRTIIT |
| Sus scrofa                  | ENVTSIMFLV | ALSEYDQVLV | ESDNENRMEE | SKALFRTIIT |
| Ursus arctos horribilis     | ENVTSIMFLV | ALSEYDQVLV | ESDNENRMEE | SKALFRTIIT |
| Callithrix jacchus          | ENVTSIMFLV | ALSEYDQVLV | ESDNENRMEE | SKALFRTIIT |
| Propithecus coquereli       | ENVTSIMFLV | ALSEYDQVLV | ESDNENRMEE | SKALFRTIIT |
| Delphinapterus leucas       | ENVTSIMFLV | ALSEYDQVLV | ESDNENRMEE | SKALFRTIIT |
| Rhinopithecus roxellana     | ENVTSIMFLV | ALSEYDQVLV | ESDNENRMEE | SKALFRTIIT |
| Monodelphis domestica       | ENVTSIMFLV | ALSEYDQVLV | ESDNENRMEE | SKALFRTIIT |
| Sarcophilus harrisi         | ENVTSIMFLV | ALSEYDQVLV | ESDNENRMEE | SKALFRTIIT |
| Lipotes vexillifer          | ENVTSIMFLV | ALSEYDQVLV | ESDNENRMEE | SKALFRTIIT |
| Tursiops truncatus          | ENVTSIMFLV | ALSEYDQVLV | ESDNENRMEE | SKALFRTIIT |
| Bos taurus                  | ENVTSIMFLV | ALSEYDQVLV | ESDNENRMEE | SKALFRTIIT |
| Odobenus rosmarus divergens | ENVTSIMFLV | ALSEYDQVLV | ESDNENRMEE | SKALFRTIIT |
| Felis catus                 | ENVTSIMFLV | ALSEYDQVLV | ESDNENRMEE | SKALFRTIIT |
| Capra hircus                | ENVTSIMFLV | ALSEYDQVLV | ESDNENRMEE | SKALFRTIIT |
| Nomascus leucogenys         | ENVTSIMFLV | ALSEYDQVLV | ESDNENRMEE | SKALFRTIIT |
| Equus caballus              | ENVTSIMFLV | ALSEYDQVLV | ESDNENRMEE | SKALFRTIIT |
| Erinaceus europaeus         | ENVTSIMFLV | ALSEYDQVLV | ESDNENRMEE | SKALFRTIIT |
| Danio rerio                 | ENVTSIMFLV | ALSEYDQVLV | ESDNENRMEE | SKALFRTIIT |
| Ictalurus punctatus         | ENVTSIMFLV | ALSEYDQVLV | ESDNENRMEE | SKALFRTIIT |
| Xenopus tropicalis          | ENVTSIMFLV | ALSEYDQVLV | ESDNENRMEE | SKALFRTIIT |

Switch III

Figure S8. Sequence alignment of *GNAQ* orthologs centred on the Switch III loop (236-246 based on human sequence)



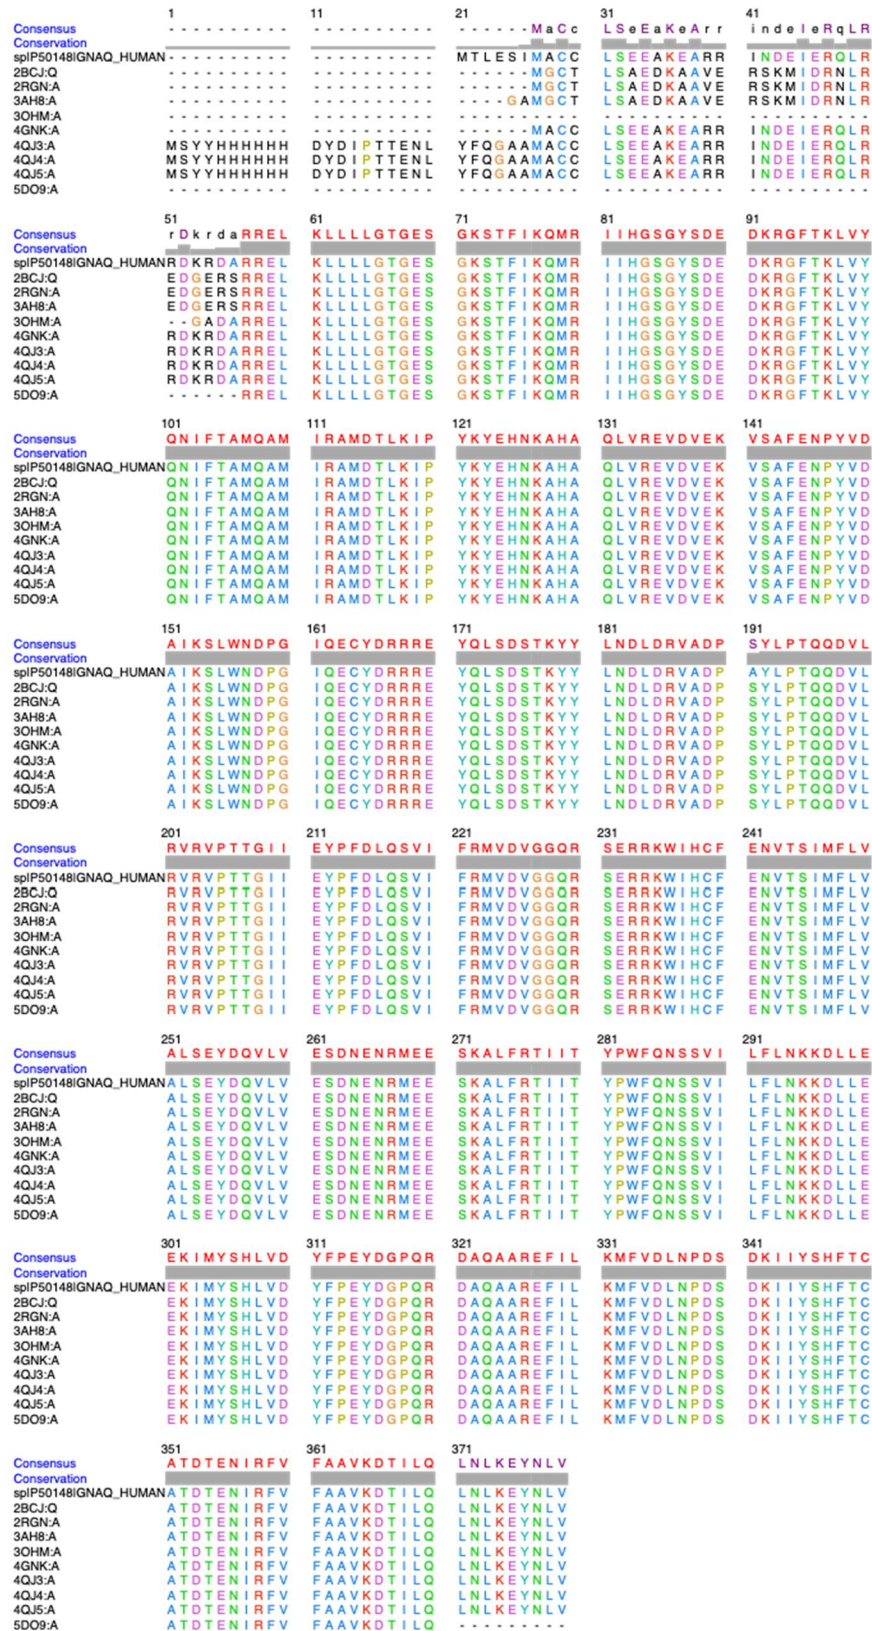

**Figure S9.** Sequence alignment of the PDB sequences of the chains of interest and the Human sequence of GNAQ, retrieved from UniProt

For our analysis, we decided to analyse experimental structures from *Mus musculus*  $G\alpha_q$  and *Mus Musculus x Rattus norvegicus*  $G\alpha_i/G\alpha_q$  chimera, as they share high sequence identities with human

$G\alpha_q$ . Structures were retrieved from the PDB [2]: 3ah8 [3] (sole inactive conformation), 2bcj [4], 2rgn [4], 3ohm [5], 4gnk [6], 4qj3 [7], 4qj4 [7], 4qj5 [7], 5do9 [8]. Two other structures of *Mus musculus*  $G\alpha_q$  protein are available in the PDB (i.e., 4ekd, 4ekc). As they contain mutations, we chose not to include them in our study. A description of the structure information is presented in Table .

**Table S2.** 3D structures information. A is for active conformation and I for inactive conformation. \* Sequence identities between the human and the chain sequences were calculated using Chimera.

| PDB_id   | Organism                                          | Protein               | Chain | Identity with human $G\alpha_q$ * | Resolution (Å) | R-value Free | R-value work | pH   | Temperature (K) |
|----------|---------------------------------------------------|-----------------------|-------|-----------------------------------|----------------|--------------|--------------|------|-----------------|
| 3ah8 (I) | <i>Rattus norvegicus, Mus musculus</i> (chimeric) | $G\alpha_i/G\alpha_q$ | A     | 94.1%                             | 2.9            | 0.315        | 0.259        | 5.1  | 293             |
| 2rgn (A) | <i>Rattus norvegicus, Mus musculus</i> (chimeric) | $G\alpha_i/G\alpha_q$ | A     | 94.6%                             | 3.5            | 0.299        | 0.243        | 6.5  | 277             |
| 2bcj (A) | <i>Rattus norvegicus, Mus musculus</i> (chimeric) | $G\alpha_i/G\alpha_q$ | Q     | 94.6%                             | 3.06           | 0.292        | 0.243        | 6.5  | 277             |
| 4gnk (A) | <i>Mus musculus</i>                               | $G\alpha_q$           | A     | 99.7%                             | 4.00           | 0.255        | 0.214        | 6.75 | 277.15          |
| 5do9 (A) | <i>Mus musculus</i>                               | $G\alpha_q$           | A     | 99.7%                             | 2.60           | 0.226        | 0.178        | 5.5  | 277.15          |
| 3ohm (A) | <i>Mus musculus</i>                               | $G\alpha_q$           | A     | 99.1%                             | 2.70           | 0.275        | 0.204        | 6    | 291             |
| 4qj3 (A) | <i>Mus musculus</i>                               | $G\alpha_q$           | A     | 98.1%                             | 3.00           | 0.240        | 0.195        | 6    | 277.15          |
| 4qj4 (A) | <i>Mus musculus</i>                               | $G\alpha_q$           | A     | 98.1%                             | 3.30           | 0.267        | 0.208        | 6.5  | 277.15          |
| 4qj5 (A) | <i>Mus musculus</i>                               | $G\alpha_q$           | A     | 98.1%                             | 3.41           | 0.277        | 0.212        | 6.25 | 277.15          |

All structures were obtained with high resolution and the chains of interest have high sequence identities with the human  $G\alpha_q$ . The pH range of crystals preparation is comprised between 5.1 for 3ah8 and 6.25 for 5do9, and the temperature ranges from 277K for 2rgn and 2bcj, to 291K for 3ah8.

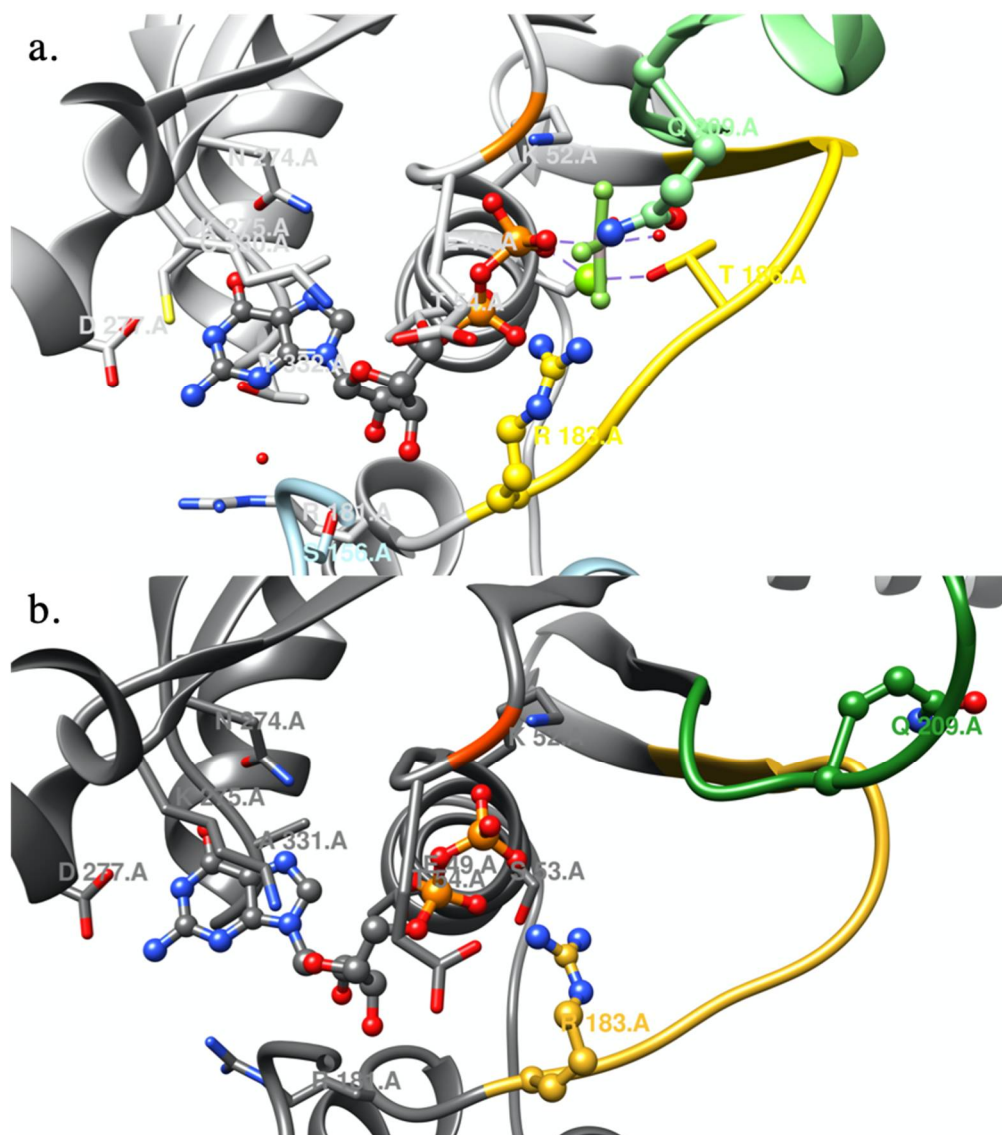

**Figure S10.** Residues in contact with ligands. (a). Active conformation crystallized in the presence of GDP, AlF<sub>4</sub> and Mg<sup>2+</sup> (PDB ID 3ohm); (b) Inactive conformation crystallized in the presence of GDP (PDB ID 3ah8). Hotspots Arg183 and Gln209 and GDP and AlF<sub>4</sub> are in ball&stick, Mg<sup>2+</sup> is in sphere, and the residues in contact with ligands are in sticks. SW-I (183-192) is in gold and SW-II (206-222) in green. SW-III is cut from the pictures to make them readable.

**Table S3.** FoldX energy analysis. Gibbs energies ( $\Delta G$ ) of each complex calculated by FoldX in kcal/mol.

| PDB-ID | conformation | $\Delta G - WT$ (kcal/mol) | $\Delta G - MUT$ (kcal/mol) | $\Delta\Delta G$ (kcal/mol) |
|--------|--------------|----------------------------|-----------------------------|-----------------------------|
| 3ah8   | Inactive     | 686.08                     | 685.7                       | 0.38                        |
| 2rgn   | Active       | 623.772                    | 622.804                     | 0.968                       |
| 4gnk   | Active       | 770.213                    | 769.101                     | 1.112                       |
| 5do9   | Active       | 107.297                    | 106.156                     | 1.141                       |
| 3ohm   | Active       | 787.41                     | 785.7                       | 1.71                        |
| 4qj4   | Active       | 458.572                    | 456.77                      | 1.802                       |
| 4qj5   | Active       | 651.392                    | 649.573                     | 1.819                       |
| 2bcj   | Active       | 697.385                    | 695.083                     | 2.302                       |
| 4qj3   | Active       | 334.318                    | 331.149                     | 3.169                       |

**a. Inactive conformation**

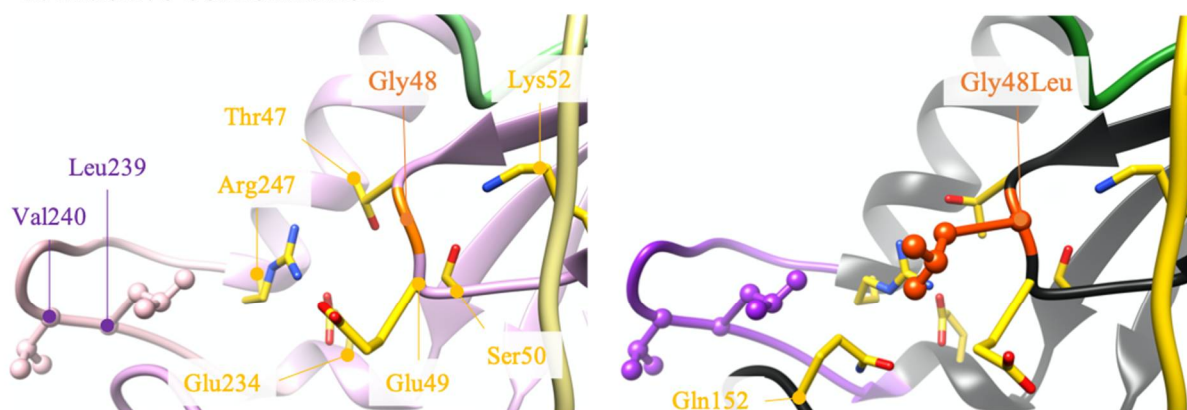

**b. Active conformation**

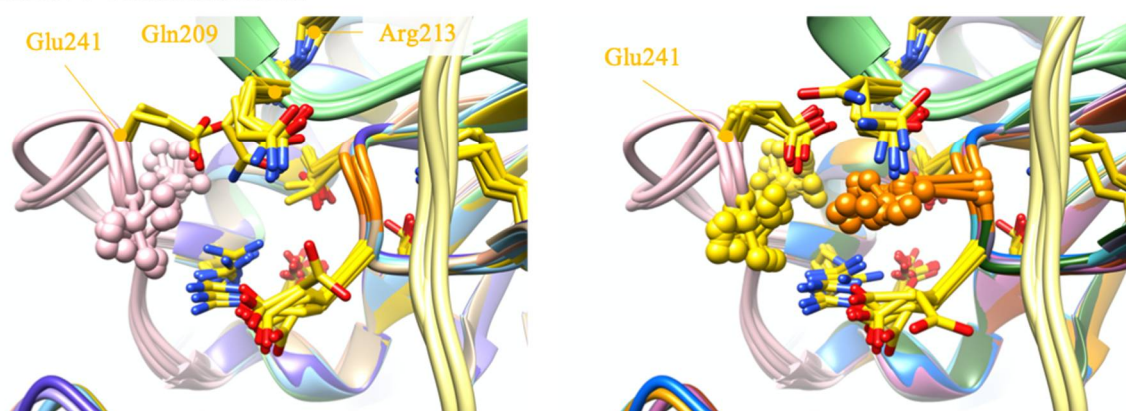

**Wild-type Structures**

**Predicted Mutant Structures**

**Figure S11.** Wild-type and Mutated residue's neighbors. (a). Inactive structures (3ah8); (b). Active structures (2bcj, 2rgn, 3ohm, 4gnk, 4qj3, 4qj4, 4qj5, 5do9). Gly48Leu, Leu239 and Val240 are in ball&stick, residues that are at a distance inferior to 5Å to position 48 are in golden sticks. SW-I, SW-II and SW-III are in yellow, green and pink, respectively. Position 48 is colored in orange. For clarity, residues that are already mentioned in (a)-wild-

type are not mentioned in the other pictures. Left pictures represent the wild-type structures and the right one the Gly48Leu predicted structures generate with FoldX.

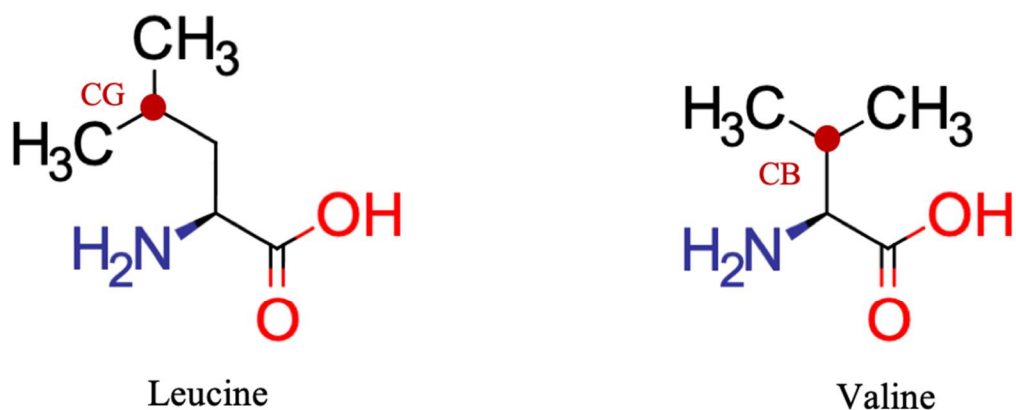

| PDB-ID | Conformation | Distance (Å) |            |                 |
|--------|--------------|--------------|------------|-----------------|
|        |              | V240         | CB-G48L CG | L239 CG-G48L CG |
| 3ah8   | Inactive     |              | 8.769      | 15.823          |
| 2rgn   | Active       |              | 5.447      | 6.971           |
| 4gnk   | Active       |              | 5.256      | 7.048           |
| 5do9   | Active       |              | 5.44       | 6.858           |
| 3ohm   | Active       |              | 5.234      | 6.274           |
| 4qj4   | Active       |              | 5.315      | 6.037           |
| 4qj5   | Active       |              | 5.393      | 7.178           |
| 2bcj   | Active       |              | 5.435      | 6.626           |
| 4qj3   | Active       |              | 5.274      | 6.481           |

**Figure S12.** Structural analysis. Distances measured between atoms L239 C and G48L C , and V240 C and G48L C .

|                                  | s s n g h i Y p q - | - q A P Y W T H P q | R M E K K L H A V P | A G N T V K F R C P | A a G n P t P T I R | W - L K d G q a F h | G E H R I G G I R L |
|----------------------------------|---------------------|---------------------|---------------------|---------------------|---------------------|---------------------|---------------------|
| Homo sapiens                     | P S N R H S Y P Q - | - Q A P Y W T H P Q | R M E K K L H A V P | A G N T V K F R C P | A A G N P T P T I R | W - L K D G Q A F H | G E N R I G G I R L |
| Rattus norvegicus                | S S S G H S Y L Q - | - Q A P Y W T H P Q | R M E K K L H A V P | A G N T V K F R C P | A A G N P M P T I H | W - L K N G Q A F H | G E N R I G G I R L |
| Mus musculus                     | S S S G H V Y P Q - | - Q A P Y W T H P Q | R M E K K L H A V P | A G N T V K F R C P | A A G N P M P T I H | W - L K D G Q A F H | G E N R I G G I R L |
| Myotis lucifugus                 | P S N R H V Y P Q - | - H A P Y W T H P Q | R M E K K L H A V P | A G N T V K F R C P | A A G N P T P T I R | W - L K D G Q D F H | G E H R S I A I E L |
| Cavia porcellus                  | S S N G H I Y L Q - | - Q A P Y W T H P Q | R M E K K L H A V P | A G N T V K F R C P | A A G N P M P T I H | W - L K D G H A F H | G E N R I G G I R L |
| Sus scrofa                       | P S N G H I Y P Q - | - Q A P Y W T H P Q | R M E K K L H A V P | A G N T V K F R C P | A A G N P M P T I R | W - L K D G Q D F H | G E N R I G G I R L |
| Ailuropoda melanoleuca           | P L N G H I Y P Q - | - Q A P Y W T H P Q | R M E K K L H A V P | A G N T V K F R C P | A A G N P T P T I R | W - L K D G Q D F H | G E H R I G G I R L |
| Bos taurus                       | P L N G H V Y P Q - | - Q A P Y W T H P Q | R M E K K L H A V P | A G N T V K F R C P | A A G N P M P T I R | W - L K D G Q D F H | G E H R I G G I R L |
| Ovis aries                       | P L N G H I Y P Q - | - Q A P Y W T H P Q | R M E K K L H A V P | A G N T V K F R C P | A A G N P M P T I R | W - L K D G Q D F H | G E H R I G G I R L |
| Equus caballus                   | P S N G H V Y P Q - | - Q A P Y W T H P Q | R M E K K L H A V P | A G N T V K F R C P | A A G N P T P T I R | W - L K D G Q D F H | G E H R I G G I R L |
| Canis lupus familiaris           | S R N G H I Y S Q - | - Q A P Y W T H P Q | R M E K K L H A V P | A G N T V K F R C P | A A G N P M P T I R | W - L K D G Q D F H | G E H R I G G I R L |
| Felis catus                      | P S N G H I Y P Q - | - Q A P Y W T H P Q | R M E K K L H A V P | A G N T V K F R C P | A A G N P M P T I R | W - L K D G K D F H | G E H R I G G I R L |
| Mustela putorius furo            | P L N G H I Y P Q - | - Q A P Y W T H P Q | R M E K K L H A V P | A G N T V K F R C P | A A G N I P T I R   | W - L K D G Q D F H | G E H R I G G I R L |
| Loxodonta africana               | P S N G H V Y P Q - | - Q A P Y W T H P Q | R M E K K L H A V P | A G N T V K F R C P | A A G N P T P T I R | W - L K D G Q D F H | G E H R I G G I R L |
| Callithrix jacchus               | S S N G H I Y P Q - | - Q A P Y W T H P Q | R M E K K L H A V P | A G N T V K F R C P | A A G N P T P T I R | W - L K D G Q A F H | G E N R I G G I R L |
| Pan troglodytes                  | P S N R H I Y P Q - | - Q A P Y W T H P Q | R M E K K L H A V P | A G N T V K F R C P | A A G N P T P T I R | W - L K D G Q A F H | G E N R I G G I R L |
| Pan paniscus                     | P S N R H I Y P Q - | - Q A P Y W T H P Q | R M E K K L H A V P | A G N T V K F R C P | A A G N P T P T I R | W - L K D G Q A F H | G E N R I G G I R L |
| Rhinopithecus roxellana          | S S Y G H I Y P Q - | - Q A P Y W T H P Q | R M E K K L H A V P | A G N T V K F R C P | A A G N P T P T I R | W - L K D G Q A F H | G E N R I G G I R L |
| Colobus angolensis palliatus     | S S N G H I Y P Q - | - Q A P Y W T H P Q | R M E K K L H A V P | A G N T V K F R C P | A A G N P T P T I R | W - L K D G Q A F H | G E N R I G G I R L |
| Chlorocebus sabaeus              | S S N G H I Y P Q - | - Q A P Y W T H P Q | R M E K K L H A V P | A G N T V K F R C P | A A G N P T P T I R | W - L K D G Q A F H | G E N R I G G I R L |
| Macaca nemestrina                | S S N G H I Y P Q - | - Q A P Y W T H P Q | R M E K K L H A V P | A G N T V K F R C P | A A G N P T P T I R | W - L K D G Q A F H | G E N R I G G I R L |
| Cercocebus atys                  | S S N G H I Y P Q - | - Q A P Y W T H P Q | R M E K K L H A V P | A G N T V K F R C P | A A G N P T P T I R | W - L K D G Q A F H | G E N R I G G I R L |
| Mandrillus leucophaeus           | S S N G H I Y P Q - | - Q A P Y W T H P Q | R M E K K L H A V P | A G N T V K F R C P | A A G N P T P T I R | W - L K D G Q A F H | G E N R I G G I R L |
| Papio anubis                     | S S N G H I Y P Q - | - Q A P Y W T H P Q | R M E K K L H A V P | A G N T V K F R C P | A A G N P T P T I R | W - L K D G Q A F H | G E N R I G G I R L |
| Mesocricetus auratus             | S S H G H V Y P Q - | - Q A P Y W T H P Q | R M E K K L H A V P | A G N T V K F R C P | A A G N P M P T I H | W - L K D G Q A F H | G E N R I G G I R L |
| Danio rerio                      | T E N D Q V Y I S - | - R A P Y W T H T Q | R M E K K L Y A V P | A G N T V K F R C P | A T G S P L P T I R | W - L K N G R E F R | G E H R I G G I K L |
| Xenopus laevis                   | I N E E P V Y F F - | - Q A P Y W T Q P S | R M D K K L H A V P | A G N T V K F R C P | A G G S P L P T I R | W S L K N G R E F R | G E H R I G G I Q I |
| Xenopus laevis                   | I N E E P V Y F F - | - Q A P Y W T Q P H | R M D K K L H A V P | A G N T V K F R C P | A G G S P L P T I R | W - L K N G R E F R | G E H R I G G I Q I |
| Pleurodeles waltl                | M G E D P P Y S T S | Y R A P F W S Q P Q | R M D K K L Y A V P | A G N T V K F R C P | A G N P T P G I R   | W - L K N G R E F G | G E H R I G G I R L |
| Anolis carolinensis              | S N E E P V N T R - | - R A P Y W T H P H | R M D K K L Y A V P | A G N T V K F R C P | A S G S P N P I I R | W - L K N G R D F R | G E H R I G G I R L |
| Ficedula albicollis              | Q N E E S V Y V H - | - R A P Y W T H P H | R M D K K L Y A V P | A G N T V K F R C P | A S G N P S P S I R | W - F K N G R E F R | G E H R I G G I R L |
| Anas platyrhyn...s platyrhyncho: | R G E E P V Y V H - | - R A P Y W T H P H | R M D K K L Y A V P | A G N T V K F R C P | A S G S P S P S I R | W - F K N G R E F R | G E H R I G G I R L |
| Coturnix coturnix                | R S E E P V Y V H - | - R A P Y W T H P H | R M D K K L Y A V P | A G N T V K F R C P | A S G S P S P S I R | W - F K N G R E F R | G E H R I G G I R L |
| Gallus gallus                    | R S E E P V Y V H - | - R A P Y W T H P H | R M D K K L Y A V P | A G N T V K F R C P | A S G S P S P S I R | W - F K N G R E F R | G E H R I G G I R L |

Human Cys172

**Figure S13.** *FGFR4* Multiple sequence alignment centered on the Homo sapiens Cys172. Sequence retrieved from UniProt and alignment done with MUSCLE.

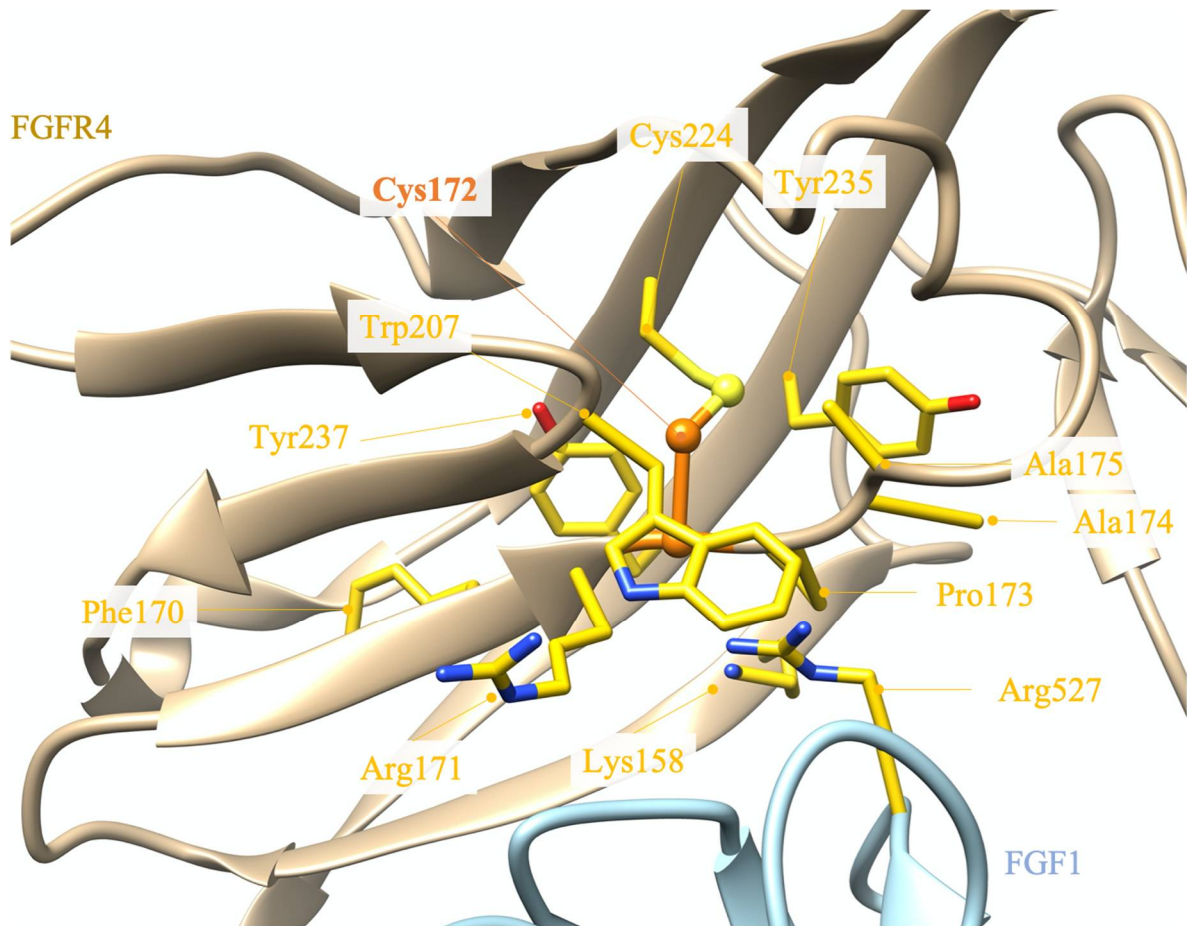

**Figure S14.** *FGFR4* p.Cys174 environment. Residues that are within 5Å from the *FGFR4* p.Cys174 are represented in golden sticks. Cys172 is in orange ball&stick. *FGFR4* is represented in tan ribbon and *FGF1* in light blue ribbon (PDB ID 1qct) [9]

**Table S4.** The results of the in-house NGS panel. BAP1 presented both with a mutation and a loss of one allele leading to a loss of heterozygosity (LOH)

| Gene ID | Alterations                        | Allele frequency or level of CNV |
|---------|------------------------------------|----------------------------------|
| GNAQ    | c.142_143delinsTT<br>(p.Gly48Leu)  | 41%                              |
| FGFR4   | c.514T>G<br>(p.Cys271Gly)          | 47%                              |
| BAP1    | c.68-4_84delinsGA<br>and LOH of 3p | 82%<br>(due to LOH)              |
| NRAS    | Deletion                           | 1x copy left                     |
| 3p      | Loss                               | LOH                              |
| 6q      | Loss                               | LOH                              |
| 6p      | Gain                               | 3x                               |

## References

- [1] Potapov, V.; Cohen, M.; Schreiber, G. Assessing computational methods for predicting protein stability upon mutation: Good on average but not in the details. *Protein Eng. Des. Sel.* **2009**, *22*, 553–560. <https://doi.org/10.1093/protein/gzpz030>.
- [2] Moorhouse, M.; Barry, P. The Protein Databank. *Bioinforma. Biocomput. Perl*, **2005**. <https://doi.org/10.1002/0470020571.ch10>.
- [3] Nishimura, A.; Kitano, K.; Takasaki, J.; Taniguchi, M.; Mizuno, N.; Tago, K.; et al. Structural basis for the specific inhibition of heterotrimeric G<sub>q</sub> protein by a small molecule. *Proc. Natl. Acad. Sci.* **2010**, *107*, 13666–13671. <https://doi.org/10.1073/pnas.1003553107>.
- [4] Tesmer, V.M.; Kawano, T.; Shankaranarayanan, A.; Kozasa, T.; Tesmer, J.J.G. Snapshot of Activated G Proteins at the Membrane: The G<sub>αq</sub>-GRK2-G<sub>βγ</sub> Complex. *Science (80-)* **2005**.
- [5] Waldo, G.L.; Ricks, T.K.; Hicks, S.N.; Cheever, M.L.; Kawano, T.; Tsuboi, K.; et al. Kinetic scaffolding mediated by a phospholipase C-β and G<sub>q</sub> signaling complex. *Science (80-)* **2010**, <https://doi.org/10.1126/science.1193438>.
- [6] Lyon, A.M.; Dutta, S.; Boguth, C.A.; Skiniotis, G.; Tesmer, J.J.G. Full-length G<sub>αq</sub>-phospholipase C-β3 structure reveals interfaces of the C-terminal coiled-coil domain. *Nat. Struct. Mol. Biol.* **2013**, <https://doi.org/10.1038/nsmb.2497>.
- [7] Lyon, A.M.; Tesmer, J.J.G. Structural insights into phospholipase C-β function. *Mol. Pharmacol.* **2013**, <https://doi.org/10.1124/mol.113.087403>.
- [8] Taylor, V.G.; Bommarito, P.A.; Tesmer, J.J.G. Structure of the Regulator of G Protein Signaling 8 (RGS8)-G<sub>αq</sub> Complex. *J. Biol. Chem.* **2016**, <https://doi.org/10.1074/jbc.m115.712075>.
- [9] Huhtala, M.T.; Pentikainen, O.T.; Johnson, M.S. A dimeric ternary complex of FGFR1, heparin and FGF-1 leads to an “electrostatic sandwich” model for heparin binding. *Structure* **1999**, *7*, 699–709, [https://doi.org/10.1016/S0969-2126\(99\)80129-4](https://doi.org/10.1016/S0969-2126(99)80129-4).
